# Supplementary material for: A New Visualization for Probabilistic Situations Containing Two Binary Events: The Frequency Net
Source: PubMed Central journal article supplement (PMC7264419; doi:10.3389/fpsyg.2020.00750), 2020-05-26
Supplement: Image_1.pdf [file Image_1.pdf]

## Supplementary Material

### 1 Supplementary Figures

Supplementary Figure 1 shows the percentages of correct inferences in the question for a conditional probability, separated for information format and visualization and separated for the two contexts (mammography problem vs. economics problem).

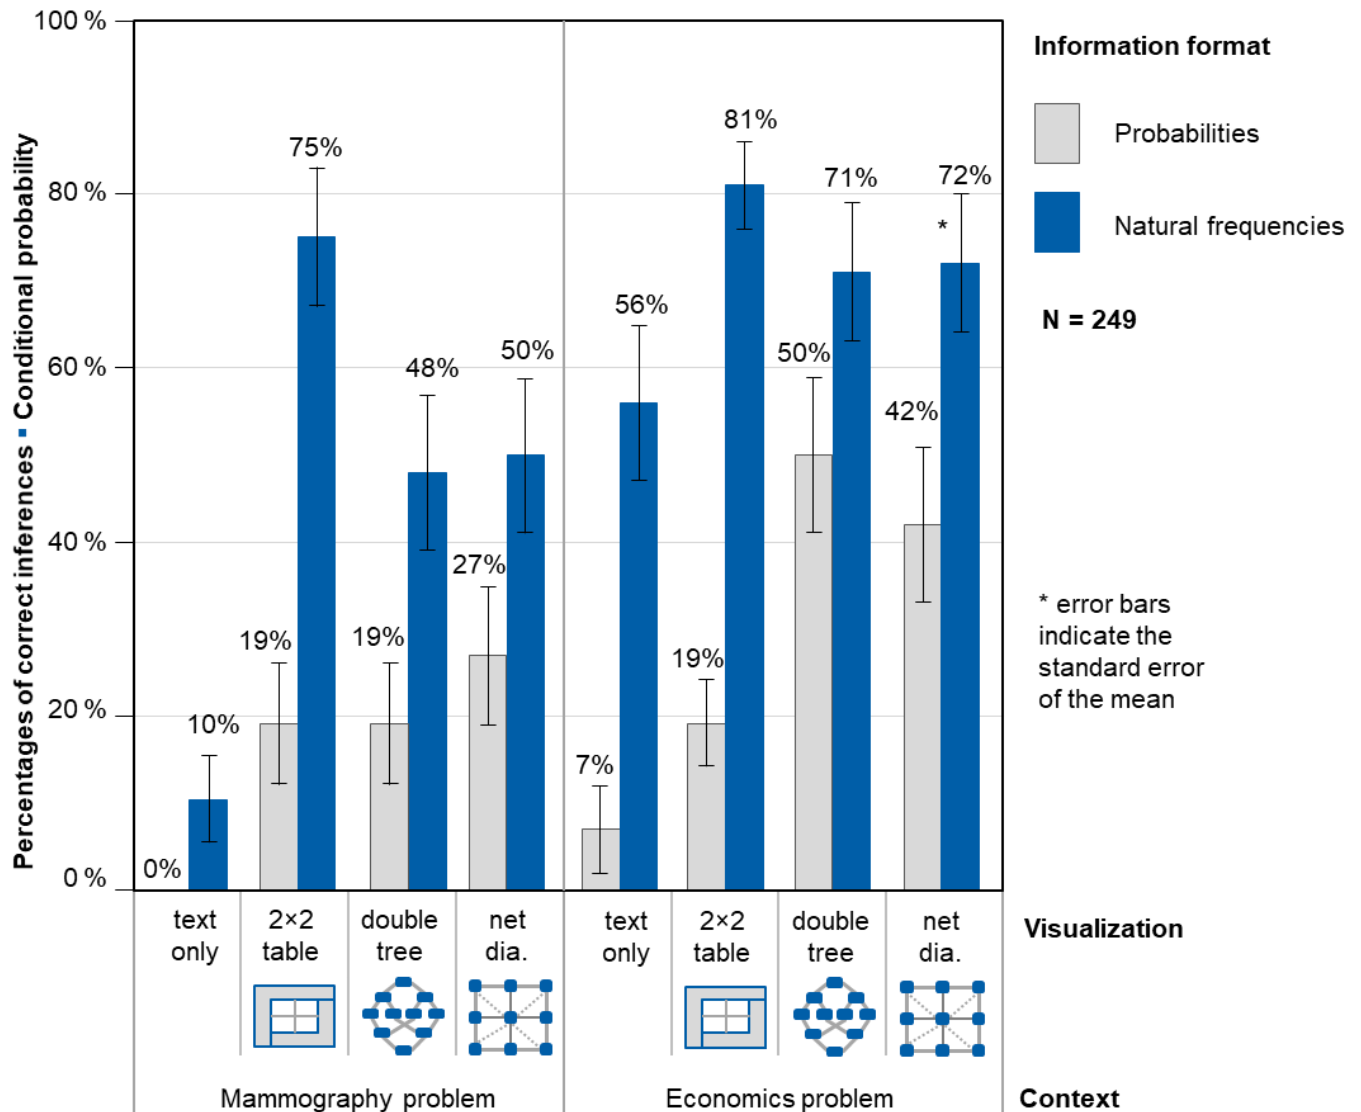

**Supplementary Figure 1.** Percentages of correct inferences in the question for a conditional probability, separated for information format and visualization and separated for the two contexts (mammography problem vs. economics problem)

Furthermore, supplementary Figure 2 shows the percentages of correct inferences in the question for a joint probability, separated for information format and visualization and separated for the two contexts (mammography problem vs. economics problem).

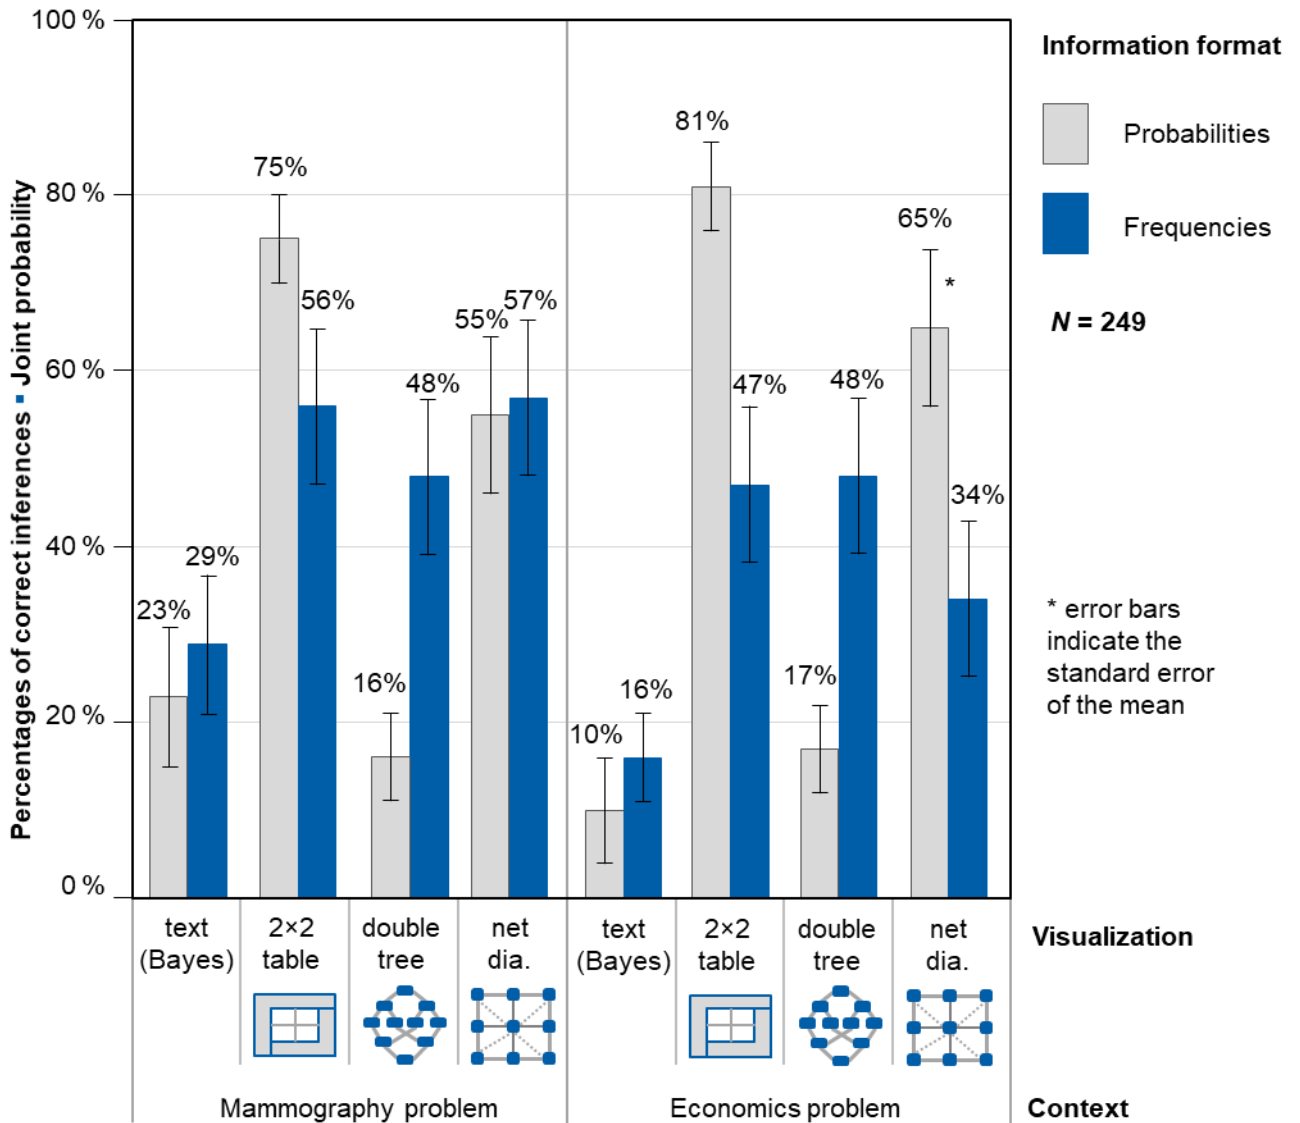

**Supplementary Figure 2.** Percentages of correct inferences in the question for a joint probability, separated for information format and visualization and separated for the two contexts (mammography problem vs. economics problem)
